# Supplementary material for: Single-Cell Transcriptome Analysis Reveals Gene Signatures Associated with T-cell Persistence Following Adoptive Cell Therapy
Source: Oxford University Press journal article supplement (doi:10.1158/2326-6066.cir-19-0299), 2019-09-04
Supplement: 23266066cir190299-sup-221149_2_supp_5665481_pwyprr.xlsx [file 23266066cir190299-sup-221149_2_supp_5665481_pwyprr.xlsx]

## Sheet: 9.1-NP vs 9.2-P
Gene Name	log2 FC	p-value	FDR
GZMK	-3.47509	0	0
KLRB1	3.43248	0	0
ITGB1	1.9727	0	0
CD6	-1.70505	0	0
CD5	-1.69626	0	0
GZMB	-1.0871	0	0
CST7	-0.80564	0	0
CEBPD	-1.78724	4.17303e-283	3.69835e-281
LTB	1.15168	4.2812e-256	3.37263e-254
GCNT1	-1.74072	3.44853e-239	2.44501e-237
LAIR2	-2.41062	1.02189e-234	6.58652e-233
LYST	-1.47876	9.55119e-228	5.64316e-226
TIMP1	1.21836	5.32483e-224	2.90408e-222
AMICA1	1.05051	1.47963e-222	7.49328e-221
SKAP2	-1.94926	1.95828e-206	8.67761e-205
CCDC50	-1.94752	1.32098e-202	5.50924e-201
UBXN11	1.14813	8.13762e-173	3.20532e-171
C1orf162	1.6413	3.18629e-168	1.18899e-166
EMP3	0.576886	8.62057e-151	3.05599e-149
LDOC1	-1.5237	3.86161e-139	1.30375e-137
TPRG1	-1.54654	3.01982e-138	9.73205e-137
TBXAS1	1.17051	2.71861e-133	8.3804e-132
HLA-DQB1	0.848211	7.50741e-127	2.21781e-125
SH2D1A	-0.841895	5.4739e-121	1.49269e-119
ZNF683	2.71233	7.31588e-121	1.9211e-119
C10orf54	1.19249	1.4854e-117	3.76124e-116
FAM65B	0.953181	5.13574e-117	1.2556e-115
ACTN1	-1.34367	1.33081e-116	3.14515e-115
AIF1	-1.35706	9.1201e-114	2.08585e-112
WNT11	-1.48059	1.90189e-108	3.98423e-107
CCL3	-1.51027	1.91063e-108	3.98423e-107
CTSW	-0.598658	9.72869e-108	1.97075e-106
P2RY8	0.834124	4.19361e-99	8.25908e-98
XCL2	-1.47372	3.23615e-98	6.20116e-97
SOX4	-1.89024	9.28607e-97	1.73259e-95
EOMES	-0.893437	1.97484e-95	3.59015e-94
LIME1	1.2569	1.42352e-86	2.52319e-85
LGALS1	-0.719401	7.41157e-84	1.28166e-82
SIX1	-1.03759	5.35129e-79	9.03349e-78
TRIM22	-1.13889	6.01841e-79	9.92338e-78
CDKN2A	-1.1669	2.98746e-78	4.81389e-77
NDFIP2	-1.02656	5.03443e-78	7.93203e-77
SRRT	0.807317	3.59749e-75	5.54482e-74
IL7R	1.30658	3.43734e-74	5.18526e-73
ADD3	0.705715	1.74068e-73	2.57113e-72
TSC22D3	0.678526	2.2112e-73	3.19946e-72
S1PR1	1.22441	3.79197e-73	5.37701e-72
TMEM123	0.653124	4.96269e-72	6.89911e-71
S100A10	0.517453	8.59516e-72	1.17192e-70
GPR171	0.581652	1.90168e-71	2.54394e-70
MIR155HG	-1.116	2.53555e-71	3.32909e-70
PTMS	-0.795678	4.03173e-71	5.19727e-70
KLF2	1.15391	3.1096e-70	3.93697e-69
MMP25	0.789181	4.74001e-70	5.8959e-69
GZMH	-1.13765	1.81514e-69	2.21886e-68
CDC25B	0.830556	5.95997e-69	7.16206e-68
TSPAN32	0.815267	4.65496e-68	5.50061e-67
VCL	0.934692	1.36108e-65	1.58198e-64
GALNT2	-0.978881	3.23884e-64	3.70377e-63
CD70	-0.700074	4.05332e-64	4.5616e-63
CD40LG	1.13779	7.51294e-64	8.32293e-63
MGAT4A	0.681227	2.60763e-61	2.84432e-60
CALM1	0.3182	2.38576e-59	2.56288e-58
SLC1A5	-0.91096	1.89307e-58	2.00326e-57
SCML4	0.855507	6.23059e-58	6.4963e-57
FASLG	-0.889245	1.00632e-55	1.01926e-54
CD59	-0.793634	1.25804e-55	1.25627e-54
FLNA	0.476032	2.8039e-55	2.76106e-54
SYNE2	0.51227	9.39697e-55	9.12665e-54
NCR3	0.514046	1.92096e-53	1.84049e-52
SYNJ2	0.797531	3.8022e-53	3.59434e-52
LAG3	0.518116	2.90582e-52	2.71082e-51
AFAP1L2	-0.972433	2.9572e-52	2.72293e-51
IER2	0.498603	8.0394e-52	7.30761e-51
PXN	0.738235	9.10545e-52	8.17186e-51
FXYD2	-0.575185	2.28118e-51	2.02169e-50
GPR56	-0.959605	7.17825e-51	6.28318e-50
HCST	0.324856	1.60477e-50	1.38754e-49
PGD	-0.865482	1.69894e-50	1.45126e-49
MT1E	-1.01098	2.18038e-50	1.84035e-49
NCAM1	-1.09234	3.73448e-49	3.115e-48
SIRPG	-0.745774	3.15408e-48	2.60028e-47
ITGA1	-0.559066	4.18375e-48	3.40952e-47
BATF	-0.617191	3.52467e-47	2.83976e-46
UCP2	0.430872	1.72631e-46	1.37523e-45
ITGAX	-0.835159	2.84695e-46	2.24276e-45
RASGRP2	0.756333	1.8107e-44	1.41075e-43
RASA3	0.91792	4.44749e-44	3.42747e-43
STK38	0.505549	7.72682e-44	5.89066e-43
FAM102A	0.711541	2.28334e-43	1.72222e-42
GOLIM4	-0.664758	6.67979e-43	4.98524e-42
CAPG	-0.566481	9.15759e-43	6.76326e-42
PYHIN1	-0.514782	3.99961e-42	2.92342e-41
BAZ2B	0.83656	4.19178e-42	3.03262e-41
GPR15	-0.730822	2.92268e-41	2.09311e-40
DOK2	0.500593	6.44341e-40	4.56838e-39
CITED2	0.468807	8.12574e-40	5.70411e-39
LAIR1	-0.667479	1.41592e-39	9.84203e-39
CD86	-0.732078	5.3244e-39	3.66505e-38
NCOA7	0.628309	6.2906e-39	4.2885e-38
BIN1	0.589029	6.64871e-39	4.48946e-38
HSPA1A	-0.707535	1.08816e-38	7.27838e-38
NEAT1	0.415315	7.91809e-38	5.24666e-37
SEPT6	0.378092	1.93578e-37	1.2708e-36
CXCR4	-0.6476	4.56899e-37	2.97194e-36
TXNIP	-0.441886	8.16384e-37	5.26197e-36
FABP5	-0.846818	2.30148e-36	1.47004e-35
TMEM63A	0.684199	2.13853e-35	1.35376e-34
MYC	0.846427	9.97007e-35	6.25555e-34
FAIM3	0.575305	2.53172e-34	1.57455e-33
RORA	0.496248	6.2347e-34	3.84383e-33
H2AFZ	-0.378416	8.28332e-34	5.06282e-33
PDCD4	0.464566	1.29563e-33	7.85129e-33
ITGB2-AS1	-0.757244	5.74282e-33	3.45056e-32
MYH9	0.34498	7.8223e-33	4.66051e-32
GLUL	0.650977	8.2634e-33	4.88229e-32
GIMAP5	-0.441415	1.75428e-32	1.02792e-31
CDK6	-0.483489	2.28048e-32	1.32529e-31
CSF1	-0.789849	9.24028e-32	5.32631e-31
IVNS1ABP	-0.447477	2.17388e-31	1.24297e-30
LITAF	0.418346	3.05181e-31	1.73098e-30
SRM	0.556758	3.19687e-31	1.79888e-30
SH3BP5	0.670963	3.54613e-31	1.97969e-30
ACP5	-0.752825	5.08525e-31	2.81675e-30
SPN	0.319029	5.37088e-31	2.9519e-30
FILIP1L	-0.753475	9.70958e-31	5.29546e-30
TTC39C	0.508272	9.91416e-31	5.36576e-30
FLT3LG	0.569686	9.99754e-31	5.36989e-30
MBP	0.326192	9.42332e-30	5.02341e-29
C11orf21	0.592209	2.56588e-29	1.35762e-28
GIMAP6	-0.459236	7.55947e-29	3.97012e-28
CD55	0.55091	7.87224e-29	4.10399e-28
ANKRD32	-0.462008	9.21681e-29	4.76987e-28
SAMHD1	0.472346	1.44793e-28	7.43899e-28
FAM3C	-0.606498	1.62547e-28	8.29109e-28
MRPS6	-0.354552	2.64032e-28	1.33016e-27
ETV1	0.606874	2.64531e-28	1.33016e-27
S1PR4	0.335854	6.54189e-28	3.26634e-27
GIMAP1	0.358121	7.36013e-28	3.64918e-27
SELPLG	0.307939	1.25234e-27	6.16603e-27
PPP2R5C	0.348268	1.49779e-27	7.32369e-27
AGTRAP	-0.530067	2.94561e-27	1.43043e-26
CLU	0.412884	3.20072e-27	1.54375e-26
MT1F	0.594527	1.27269e-26	6.0969e-26
POU2F2	0.639508	2.27556e-26	1.0828e-25
CDKN1A	-0.865364	2.90103e-26	1.37122e-25
TUBB	-0.375549	5.85506e-26	2.73115e-25
RAB7L1	0.473568	5.85522e-26	2.73115e-25
AOAH	-0.339183	1.49079e-25	6.90829e-25
ATP8B4	-0.456974	9.23534e-25	4.25185e-24
PHLDA1	-0.398505	9.90707e-25	4.53168e-24
PLEK	-0.825885	1.62691e-24	7.39408e-24
PDE4D	0.469739	4.73637e-24	2.13891e-23
GIMAP4	0.416391	2.80258e-23	1.25762e-22
KIAA0319L	-0.542001	4.86109e-23	2.16762e-22
MAF	0.588636	6.54891e-23	2.90198e-22
LBH	0.383887	1.4771e-22	6.50472e-22
CMC1	-0.565783	3.94069e-22	1.72466e-21
AHNAK	0.243958	5.5504e-22	2.39953e-21
MPP1	-0.605606	8.42909e-22	3.62196e-21
GLCCI1	0.496968	9.86111e-22	4.21176e-21
PRNP	0.463002	1.10924e-21	4.70927e-21
VCAM1	-0.562787	1.53256e-21	6.46779e-21
APP	0.486392	3.09276e-21	1.2975e-20
HMGB2	-0.30884	3.49964e-21	1.45955e-20
ERMP1	-0.487993	1.06045e-20	4.39682e-20
SLC1A4	-0.415606	1.0935e-20	4.50753e-20
HLA-DMB	-0.422363	1.34243e-20	5.50163e-20
BTG1	-0.184743	1.53774e-20	6.26587e-20
XBP1	0.279684	2.5769e-20	1.04401e-19
AQP3	0.672791	2.96967e-20	1.1963e-19
PTPN22	-0.305654	3.85013e-20	1.54223e-19
ZFP36L1	0.314685	4.36438e-20	1.7384e-19
CD28	0.530707	1.27505e-19	5.05035e-19
IL2RB	-0.311176	1.64023e-19	6.46068e-19
GAB3	-0.429673	3.17939e-19	1.24541e-18
UBL3	0.497099	3.23322e-19	1.25954e-18
ITM2A	0.229193	4.06716e-19	1.57575e-18
SORL1	0.276928	5.15652e-19	1.98694e-18
MATK	0.506884	5.22093e-19	2.00089e-18
DST	-0.594499	8.00632e-19	3.05187e-18
EIF3A	0.253919	8.64137e-19	3.27633e-18
ABLIM1	0.456018	1.55366e-18	5.8593e-18
HPGD	-0.324618	1.73294e-18	6.50082e-18
ARAP2	-0.363745	2.02195e-18	7.54505e-18
FAM46C	0.439385	2.47402e-18	9.18365e-18
ESYT1	0.344995	2.65574e-18	9.80687e-18
SLC7A6	-0.490453	2.73885e-18	1.00614e-17
BCAT1	-0.528361	2.99873e-18	1.09593e-17
HAVCR2	-0.507087	3.43805e-18	1.25004e-17
TBX21	0.442249	4.68668e-18	1.68673e-17
IL9R	0.528947	5.3513e-18	1.9162e-17
ATP2B1	0.395377	1.88737e-17	6.72433e-17
LST1	-0.484194	1.98523e-17	7.00263e-17
TUBA4A	-0.272888	2.10999e-17	7.40586e-17
HLA-DRB5	-0.20077	5.92999e-17	2.07112e-16
SLC4A7	-0.262029	7.7422e-17	2.69079e-16
TUBA1A	-0.293475	1.36017e-16	4.70418e-16
ACTA2	-0.431663	1.46946e-16	5.05752e-16
KIT	-0.507544	1.81688e-16	6.22303e-16
EGLN3	-0.578889	2.87833e-16	9.81122e-16
HLA-DRB1	-0.184482	8.86026e-16	3.00571e-15
PLP2	0.271475	3.20887e-15	1.07824e-14
RB1	-0.3133	3.35221e-15	1.12109e-14
RGS18	0.482743	3.59591e-15	1.19695e-14
ZFP36	0.248551	3.80731e-15	1.26139e-14
HLA-DQA1	-0.198643	3.91797e-15	1.29202e-14
TMEM30A	-0.345412	4.10652e-15	1.34793e-14
NUCB2	-0.338006	4.73203e-15	1.54609e-14
RPS27L	-0.242957	5.13763e-15	1.67091e-14
CALR	0.21101	5.35971e-15	1.73518e-14
FGFBP2	0.692224	6.76724e-15	2.1809e-14
CPA5	-0.401237	8.48649e-15	2.72259e-14
KIAA1551	-0.237014	9.90275e-15	3.16264e-14
HSPA5	0.221118	1.275e-14	4.05371e-14
RGS2	-0.400219	1.49597e-14	4.73501e-14
TIGIT	-0.270486	1.54174e-14	4.8582e-14
RPL22L1	-0.314243	1.78023e-14	5.58489e-14
NCDN	-0.491787	1.85477e-14	5.7931e-14
JUN	-0.441022	2.32461e-14	7.22874e-14
SLC27A2	-0.436071	2.63364e-14	8.15395e-14
GCHFR	0.411476	2.72331e-14	8.39491e-14
NFKBIA	-0.359244	3.20334e-14	9.8319e-14
NTRK2	0.447552	6.29425e-14	1.92355e-13
ZBTB38	-0.297293	6.66942e-14	2.02945e-13
AKNA	-0.227405	9.28331e-14	2.81276e-13
CSGALNACT1	0.452736	1.51771e-13	4.57895e-13
REG4	-0.407973	1.72734e-13	5.18933e-13
DDX21	0.344011	1.81196e-13	5.42059e-13
ERN1	-0.263619	2.23735e-13	6.66505e-13
LYAR	0.448507	2.48894e-13	7.38352e-13
AZI2	-0.344166	2.72953e-13	8.06349e-13
PIM2	0.403442	2.78842e-13	8.20328e-13
THEM4	0.342258	3.24939e-13	9.5199e-13
PRR5L	0.388544	3.56928e-13	1.04141e-12
FKBP11	0.323169	4.1901e-13	1.21753e-12
CARS	0.354468	5.54367e-13	1.60427e-12
SPINK2	0.539298	5.90477e-13	1.70182e-12
KIF21A	-0.338976	5.97859e-13	1.71612e-12
KRT7	-0.418306	1.35906e-12	3.88538e-12
RNASE6	0.482963	1.58655e-12	4.51752e-12
CCND2	-0.303148	1.65418e-12	4.69126e-12
HLA-DQA2	-0.192437	2.0793e-12	5.87339e-12
PHPT1	-0.275488	2.25745e-12	6.35131e-12
TNFSF8	0.408733	3.14208e-12	8.80527e-12
ZMAT3	-0.419365	4.13691e-12	1.15475e-11
CORO1B	-0.321603	4.40841e-12	1.22571e-11
SUSD3	0.409879	7.30734e-12	2.02379e-11
GADD45A	-0.413593	8.88232e-12	2.45041e-11
BIRC3	0.395054	1.63771e-11	4.50052e-11
SLAMF7	-0.26293	1.77848e-11	4.8685e-11
KLF6	-0.203611	1.8342e-11	5.00173e-11
ARL4A	-0.349243	2.04138e-11	5.54537e-11
HIPK2	-0.318876	2.52917e-11	6.84421e-11
DAPK2	0.336753	2.89131e-11	7.79445e-11
BBC3	-0.360318	5.13367e-11	1.3787e-10
BAX	-0.196328	5.98315e-11	1.60078e-10
C9orf142	-0.209787	6.11004e-11	1.62858e-10
SPOCK2	-0.195537	7.46228e-11	1.98156e-10
MYADM	0.34636	7.65702e-11	2.02568e-10
TIPARP	0.322546	9.32096e-11	2.45671e-10
RGS1	-0.411775	1.1847e-10	3.11093e-10
RAB37	-0.281969	1.22784e-10	3.21233e-10
LGALS3	0.222598	1.60363e-10	4.18005e-10
IGF1	-0.400543	1.91796e-10	4.96657e-10
HNRNPAB	-0.32678	1.91938e-10	4.96657e-10
NCAPH	0.384522	2.09908e-10	5.40635e-10
CD300A	0.362357	2.10459e-10	5.40635e-10
DDIT4	-0.324497	2.17445e-10	5.56565e-10
ATP8A1	-0.257891	2.98673e-10	7.61725e-10
MYCBP2	0.254009	3.22677e-10	8.19993e-10
ISG20	0.234558	3.6031e-10	9.12356e-10
MYO6	-0.387034	5.5031e-10	1.38851e-09
HLA-DRA	-0.185983	5.7264e-10	1.43972e-09
PRDM1	-0.319847	8.45454e-10	2.11812e-09
IL18R1	0.362188	1.03157e-09	2.5753e-09
RGL4	-0.332325	1.0771e-09	2.67953e-09
IKZF3	-0.326746	1.36388e-09	3.38108e-09
KLHL23	-0.377002	1.59397e-09	3.93771e-09
DYNC2H1	-0.335816	1.76769e-09	4.3517e-09
MSC	0.301233	2.00952e-09	4.92992e-09
CDC14A	0.294967	2.20328e-09	5.38663e-09
LGALS8	0.266546	3.15524e-09	7.68751e-09
LMNA	0.25046	3.1873e-09	7.73902e-09
BPTF	-0.197407	3.57119e-09	8.64156e-09
BHLHE40	-0.213652	4.11559e-09	9.92501e-09
FOXP3	-0.563197	4.27022e-09	1.0263e-08
CD27	-0.261937	4.3806e-09	1.04927e-08
SPTBN1	0.327871	4.59573e-09	1.09709e-08
C4orf26	-0.262923	5.06101e-09	1.20411e-08
MIR142	0.177575	5.30511e-09	1.25797e-08
CKAP2L	-0.438298	8.99832e-09	2.1266e-08
SQLE	-0.303794	1.02533e-08	2.41515e-08
PDE3B	0.208202	1.15901e-08	2.712e-08
CANX	0.156271	1.32965e-08	3.10105e-08
GPR65	0.294073	2.00264e-08	4.65531e-08
YWHAQ	0.175772	2.03855e-08	4.7233e-08
TGFBR3	0.294692	2.24187e-08	5.17747e-08
RGS13	-0.320461	2.27299e-08	5.2323e-08
SOCS1	-0.310601	3.06407e-08	7.0305e-08
ITM2C	0.410006	4.22736e-08	9.66838e-08
SLC2A8	-0.260549	4.46949e-08	1.01893e-07
CDK2AP2	-0.158694	7.20531e-08	1.63736e-07
ANP32B	0.154253	9.15667e-08	2.07415e-07
HLA-DMA	-0.164578	1.03994e-07	2.34815e-07
PRKCA	-0.245317	1.21293e-07	2.73006e-07
ATAD2	-0.320681	1.26634e-07	2.84125e-07
PATL2	0.296142	1.52659e-07	3.41435e-07
ADI1	0.278376	1.59469e-07	3.55546e-07
CECR1	0.231214	1.63279e-07	3.62898e-07
TFRC	0.287056	2.39326e-07	5.30256e-07
PLCG1	0.258952	5.28253e-07	1.16314e-06
NR3C1	-0.142583	5.52266e-07	1.21225e-06
SDF2L1	0.202588	5.90272e-07	1.29167e-06
F2R	-0.16286	7.15122e-07	1.56007e-06
H2AFV	0.177637	1.07343e-06	2.33455e-06
CD84	0.215802	1.12838e-06	2.44656e-06
TUBA1B	-0.248442	1.23934e-06	2.67895e-06
AL592183.1	0.171355	1.47683e-06	3.18258e-06
ADRB2	-0.295098	1.51221e-06	3.24895e-06
DPP4	-0.21129	1.75468e-06	3.75851e-06
MCM5	-0.29323	1.94153e-06	4.14621e-06
SLC20A1	-0.194886	2.14946e-06	4.57648e-06
RDX	-0.226886	2.21017e-06	4.69165e-06
MDM2	-0.236259	2.22294e-06	4.70467e-06
AHI1	0.214491	2.50622e-06	5.28842e-06
GIMAP7	-0.168706	2.6871e-06	5.65327e-06
BTG2	-0.189522	3.59119e-06	7.53301e-06
CCR5	-0.287584	3.71228e-06	7.76403e-06
HSF4	-0.289354	3.8442e-06	8.01628e-06
HIST1H1D	0.262222	3.99586e-06	8.3081e-06
AGA	0.237275	4.2773e-06	8.86727e-06
NEK1	-0.21434	4.47655e-06	9.25328e-06
EEA1	0.252488	4.49248e-06	9.25921e-06
AGPAT9	-0.272954	4.52001e-06	9.28896e-06
FUCA1	-0.284709	4.67984e-06	9.58962e-06
ACTG1	-0.10813	8.02365e-06	1.63942e-05
ARID5B	0.22894	8.26158e-06	1.68318e-05
MT-ND6	-0.155593	8.8475e-06	1.79739e-05
UTRN	-0.178561	9.2582e-06	1.87545e-05
RAD21	0.145097	9.8307e-06	1.98575e-05
CENPU	-0.325702	1.01545e-05	2.0433e-05
GBP5	-0.154277	1.01733e-05	2.0433e-05
GADD45B	0.212793	1.04766e-05	2.09828e-05
TPM4	0.182867	1.11527e-05	2.2274e-05
RDH10	0.232941	1.1488e-05	2.28791e-05
ASB2	-0.228171	1.15613e-05	2.29607e-05
SERPINB9	-0.234231	1.43552e-05	2.84298e-05
CTNNAL1	-0.284436	2.26407e-05	4.47138e-05
GZMM	-0.145581	2.46348e-05	4.85169e-05
WAC-AS1	0.21296	3.05431e-05	5.99863e-05
C1orf63	0.116634	3.10875e-05	6.08868e-05
MZB1	0.252851	3.36617e-05	6.5747e-05
LRRN3	0.145228	3.59609e-05	7.00447e-05
RAD50	-0.171532	3.9862e-05	7.74306e-05
RUNX3	0.182501	4.38661e-05	8.49755e-05
DZIP3	0.235663	5.04025e-05	9.7107e-05
TNFAIP3	0.225079	5.76684e-05	0.000110805
DHFR	0.253356	6.09962e-05	0.000116882
FDXR	-0.242916	8.27072e-05	0.000158058
PRKCB	0.161723	8.59186e-05	0.000163753
SAMD3	0.149149	8.65509e-05	0.000164516
CKAP2	0.198802	0.000108829	0.00020631
MIA3	0.164218	0.000143	0.000270365
STAT1	0.171114	0.000153518	0.000289479
CNTRL	0.176943	0.000171396	0.000322334
PTP4A1	-0.194852	0.000184002	0.000345126
RPS6KA5	0.1652	0.000198952	0.000372182
IL2RA	-0.181906	0.000210661	0.00039305
GBP4	-0.172076	0.000228631	0.000425457
HTATSF1	-0.152051	0.000247981	0.000460259
EIF2AK2	-0.173063	0.00027729	0.000513312
RBPJ	0.118516	0.000310681	0.000573626
HIST1H2BK	-0.207849	0.000373411	0.000687658
H2AFX	-0.227119	0.000403107	0.000740422
PPAPDC1B	0.182158	0.000407192	0.000745993
KIAA1109	0.155684	0.000428977	0.000783879
PPP1R15A	0.162518	0.000466436	0.000850136
TYMS	-0.417341	0.000491123	0.000892836
NOL8	0.165092	0.000500352	0.000907288
IQGAP1	0.102319	0.000529009	0.000956804
MAPK1	-0.131816	0.000542	0.000977806
TACC3	0.197399	0.000641107	0.00115367
GBP1	0.19684	0.000709889	0.00127421
TAGAP	0.173229	0.000740857	0.00132643
SPEN	0.154212	0.000770952	0.00137684
PLSCR1	0.176956	0.000810482	0.0014438
PIK3IP1	0.160063	0.000910932	0.00161867
PDIA4	-0.130861	0.000948249	0.0016792
HSP90AB1	0.0957043	0.000949732	0.0016792
HLA-DPB1	0.0889848	0.000961204	0.00169526
HMGB1	0.0693504	0.000985339	0.00173351
PRKCDBP	-0.203666	0.00101573	0.00178255
E2F3	-0.149867	0.00103907	0.00181902
ORAI2	0.148499	0.00106577	0.00186116
MPZL3	0.172508	0.00122298	0.00213045
DENND2D	-0.135874	0.00125149	0.00217477
FEN1	-0.200287	0.00148285	0.00257052
KIAA0101	-0.273834	0.00149869	0.00259163
MT2A	0.104276	0.00164802	0.00284294
REV3L	-0.166455	0.00181451	0.00312254
TTN	-0.130392	0.00214221	0.00367755
GLO1	-0.080764	0.00221219	0.0037885
CENPK	-0.15084	0.00246771	0.00421592
KIF20B	-0.183381	0.00266417	0.00454061
CBLB	0.110676	0.00281861	0.00479231
C12orf57	-0.0919964	0.00286189	0.00485426
ZFP36L2	0.0697287	0.00309195	0.00523196
TRIP11	0.140425	0.0031872	0.0053803
ID2	-0.0847517	0.00325883	0.00548815
CEP135	-0.186161	0.00330147	0.00554678
XPC	-0.14016	0.00365434	0.00611892
ARHGAP18	-0.143573	0.00365927	0.00611892
HIST1H1C	0.154107	0.00377644	0.0063
DNAJB9	0.128792	0.0045191	0.00752123
CEP152	-0.180547	0.00471621	0.00783089
RUNX2	0.125783	0.00486936	0.0080663
NPDC1	-0.132547	0.00537824	0.00888852
SESN1	-0.155074	0.00545096	0.00898775
PAG1	-0.0825462	0.0055883	0.00919282
MCL1	-0.0957334	0.00566411	0.00929595
TNFSF10	-0.112519	0.00579307	0.00948566
TTC3	0.128558	0.00595453	0.00972756
AKAP5	-0.171944	0.00598267	0.00975107
HMGA1	0.133581	0.00602408	0.00979604
ODC1	0.139036	0.00606395	0.00983831
HSPH1	-0.149179	0.00614328	0.00994425
GATA3	-0.107852	0.00629473	0.0101662
ANXA2	-0.0759035	0.00632207	0.0101872
EZH2	-0.154222	0.00641509	0.0102903
TARSL2	0.144035	0.00660133	0.0105651
HIP1	-0.167437	0.00673048	0.0107475
HERC5	-0.164233	0.00714158	0.0113784
GPSM2	0.170208	0.00781701	0.0123978
MSH3	0.139502	0.00781787	0.0123978
USP1	0.132242	0.00783386	0.0123978
PKM	-0.0780239	0.00831037	0.0131226
NBPF14	0.118712	0.00855365	0.0134767
CD7	0.0780161	0.00872074	0.0137095
ASCC3	-0.124197	0.00887946	0.0139282
SYTL2	0.0981544	0.00966007	0.0151192
PCNA	-0.150916	0.00969737	0.0151441
CLSPN	-0.197766	0.00980658	0.015281
PLEC	-0.129603	0.0103411	0.0160786
CKS2	0.163472	0.0108671	0.0168226
JUNB	0.109464	0.0112544	0.0173842
HMGN2	0.0940122	0.0114099	0.0175861
CRYBG3	-0.142905	0.0123061	0.0189263
H1FX	0.133961	0.0125978	0.019333
VIM-AS1	0.106113	0.0134932	0.0206624
SFPQ	0.0849478	0.0161623	0.0246432
PRC1	-0.180354	0.0166358	0.0253107
SQSTM1	-0.0666964	0.0187372	0.0284469
CD68	-0.120357	0.0194326	0.0294395
MAL	0.184905	0.0195306	0.0295249
HIST1H2AC	-0.135097	0.0196051	0.0295744
MIR146A	0.124542	0.0203691	0.0306567
CDC42EP3	-0.120935	0.020409	0.0306567
PDE7B	-0.142468	0.0226554	0.0339185
DUSP2	0.13911	0.0226762	0.0339185
HELLS	-0.145881	0.0227267	0.0339226
GCC2	0.0826151	0.0239298	0.0356427
SETX	0.0951925	0.0239796	0.0356427
PTTG1	-0.119566	0.0244205	0.036222
NPC2	-0.0976161	0.0258694	0.0382134
NOP14	-0.118674	0.0258709	0.0382134
ENTPD1	-0.118851	0.0264264	0.0389528
SMC2	-0.136575	0.0272765	0.0401225
VPS13C	-0.0852271	0.0273886	0.040204
SLC39A10	0.104726	0.0310788	0.0454328
CLSTN3	-0.105646	0.0312402	0.0455746
RRM2	-0.34254	0.0341974	0.0497863

## Sheet: 9.1-NP vs 10-P
Gene Name	log2 FC	p-value	FDR
ZNF683	3.9674	0	0
GZMK	-3.55429	0	0
CCL3	-2.57171	0	0
CEBPD	-2.48373	0	0
UBXN11	1.83656	0	0
ITGB1	1.8321	0	0
LYST	-1.60873	0	0
EOMES	-1.57471	0	0
FAM65B	1.43998	0	0
TIMP1	1.43673	0	0
CD6	-1.35378	0	0
GZMB	-1.17892	0	0
CST7	-0.925627	0	0
S100A10	0.923986	0	0
WNT11	-2.14771	1.482E-323	6.571E-322
LIME1	1.78429	2.466E-317	1.029E-315
LAIR2	-2.18448	5.93775e-298	2.33881e-296
ITM2C	1.81788	4.1219e-296	1.53812e-294
AMICA1	1.01324	7.96896e-290	2.82499e-288
CPA5	-1.87258	1.78054e-284	6.01146e-283
GLUL	1.44526	1.8239e-282	5.87794e-281
SKAP2	-1.85262	2.31519e-279	7.13684e-278
CD5	-1.12319	1.12957e-254	3.33693e-253
PDE7B	1.43589	1.20828e-252	3.42669e-251
KLF2	1.68047	2.79316e-251	7.61672e-250
EMP3	0.631158	1.74974e-250	4.59469e-249
C10orf54	1.41189	9.84796e-246	2.49364e-244
LTB	0.952225	9.34065e-226	2.28363e-224
AOAH	-0.964377	1.51585e-221	3.58245e-220
PPP2R5C	0.807915	5.02869e-220	1.15011e-218
LGALS3	0.844718	9.69275e-220	2.14755e-218
HLA-DMA	-0.917	7.62312e-214	1.58965e-212
TSC22D3	0.933905	2.17357e-212	4.40303e-211
S1PR1	1.59614	7.47443e-207	1.47205e-205
LDOC1	-1.51673	4.63554e-205	8.88269e-204
TMEM123	0.888135	3.87551e-204	7.23089e-203
RASA3	1.50621	2.49136e-198	4.52916e-197
ACTN1	-1.46031	1.29056e-196	2.28752e-195
SLAMF7	-1.07191	3.14826e-185	5.31455e-184
S1PR4	0.715845	7.55978e-180	1.24648e-178
AHNAK	0.586748	2.34885e-177	3.78485e-176
BIN1	0.982621	9.02772e-174	1.42237e-172
TIGIT	-0.90479	6.73925e-171	1.03872e-169
HMGB2	-0.821833	4.51156e-168	6.80573e-167
TSPAN32	1.02944	1.08763e-162	1.60652e-161
SH2D1A	-0.810203	1.44753e-162	2.09449e-161
CDC25B	1.03034	1.35892e-161	1.92696e-160
MYADM	1.07558	9.52991e-160	1.32484e-158
ADD3	0.852753	5.12572e-159	6.98872e-158
MBP	0.618436	2.65693e-158	3.55427e-157
VCL	1.18744	4.74105e-158	6.22482e-157
PLP2	0.721534	2.44968e-157	3.15786e-156
IL7R	1.50535	1.60458e-153	2.03151e-152
GZMH	-1.46304	6.00951e-153	7.47499e-152
SPN	0.584966	1.77188e-146	2.16597e-145
UBL3	1.11193	3.62324e-146	4.35402e-145
IL9R	1.11605	9.92116e-145	1.17235e-143
FAM102A	1.04275	1.27875e-144	1.48629e-143
SIX1	-1.1922	1.33634e-143	1.52817e-142
NDFIP2	-1.17607	3.63606e-141	4.09201e-140
GCNT1	-0.992614	4.23246e-141	4.68878e-140
FASLG	-1.23127	4.54567e-141	4.95828e-140
HLA-DMB	-1.05268	5.5341e-141	5.94497e-140
SUSD3	1.13288	2.67566e-140	2.83141e-139
P2RY8	0.845613	3.19289e-140	3.32905e-139
PXN	0.968198	5.34538e-140	5.49257e-139
GIMAP5	-0.843089	1.50468e-138	1.52403e-137
CCL4	-0.936769	6.59036e-137	6.58108e-136
CARS	0.975685	5.85266e-136	5.76324e-135
SEPT6	0.606607	2.12376e-135	2.06266e-134
MIR155HG	-1.27562	3.82928e-132	3.66887e-131
GPR171	0.660064	1.95228e-131	1.84556e-130
RASGRP2	1.04129	1.86335e-129	1.73831e-128
SCML4	1.05195	1.18428e-126	1.09046e-125
PRKCB	0.779716	1.41155e-126	1.28306e-125
FLNA	0.600517	1.89527e-126	1.70094e-125
STK38	0.704875	6.97082e-126	6.17789e-125
UCP2	0.58061	1.62531e-120	1.42264e-119
NEAT1	0.620934	5.37333e-120	4.64596e-119
SOX4	-1.73899	3.81371e-118	3.25773e-117
IER2	0.621363	5.18019e-116	4.37232e-115
AFAP1L2	-1.19387	1.06353e-115	8.87112e-115
LAIR1	-0.990625	1.03421e-111	8.52625e-111
IVNS1ABP	-0.755864	6.01129e-111	4.89886e-110
RORA	0.740876	1.07604e-110	8.66944e-110
RNASE6	1.1994	2.27997e-110	1.81629e-109
GIMAP1	-0.740385	7.54882e-109	5.94679e-108
MYC	1.21285	2.70676e-108	2.10889e-107
TBXAS1	0.934208	6.67986e-108	5.14785e-107
CD55	0.872906	8.81766e-108	6.65661e-107
NCAM1	-1.3504	8.8254e-108	6.65661e-107
IGF1	-1.23114	2.69522e-107	2.01148e-106
KRT7	-1.1666	5.04878e-107	3.72873e-106
PLEK	-1.3494	2.5579e-106	1.86964e-105
C1orf162	1.13594	4.9863e-106	3.60743e-105
PYHIN1	-0.692818	2.59739e-100	1.86015e-99
MAL	1.19658	1.28276e-96	9.09476e-96
CXCR4	-0.910962	2.04943e-96	1.43866e-95
FLT3LG	0.826093	9.43968e-94	6.5615e-93
C11orf21	0.861739	1.19091e-92	8.19759e-92
CSF1	-1.10422	2.24233e-92	1.52867e-91
CDCA7	1.02609	2.31031e-89	1.54529e-88
AQP3	1.22972	6.53258e-89	4.3286e-88
GIMAP6	-0.716994	2.64775e-88	1.7382e-87
FILIP1L	-1.11542	4.5007e-88	2.92752e-87
SELPLG	0.465986	1.26122e-87	8.12915e-87
ITGAX	-0.968806	3.74095e-86	2.38949e-85
GLIPR1	-0.529727	4.53625e-84	2.87161e-83
GLCCI1	0.800805	3.71171e-83	2.32885e-82
AKNA	-0.521506	5.75208e-83	3.57739e-82
CD86	-0.908568	5.57353e-82	3.4362e-81
AGTRAP	-0.813612	5.71242e-81	3.46163e-80
CD70	-0.6765	3.85141e-79	2.31411e-78
SYNJ2	0.806269	1.52059e-77	9.05967e-77
CDKN2A	-0.943688	2.55952e-77	1.51225e-76
SH3BP5	0.863685	2.62338e-77	1.53717e-76
KLRB1	1.68834	6.90438e-77	4.01246e-76
DOK2	0.58723	3.22439e-76	1.85861e-75
CD59	-0.77211	3.52388e-76	2.01487e-75
ABLIM1	0.764415	5.20248e-76	2.95085e-75
ANXA1	-0.344487	1.03578e-74	5.82834e-74
GCHFR	0.76898	3.55917e-74	1.98697e-73
RB1	-0.632467	7.96471e-74	4.4117e-73
ARAP2	-0.654605	1.45708e-73	8.00829e-73
HLA-DRB1	-0.377057	4.15858e-73	2.26802e-72
IKZF3	-0.87423	6.53525e-73	3.53702e-72
HLA-DQB1	0.560148	1.60138e-72	8.60134e-72
CITED2	0.535733	3.16227e-71	1.68575e-70
PATL2	0.817536	5.35638e-71	2.83408e-70
DYNC2H1	-0.871956	1.67425e-70	8.7929e-70
TMEM63A	0.812875	2.82871e-70	1.47468e-69
HLA-DRB5	-0.382368	2.50016e-69	1.29388e-68
POU2F2	0.843365	7.48224e-69	3.84414e-68
CDK6	-0.607807	1.15903e-68	5.91189e-68
YWHAQ	0.439945	1.75246e-68	8.87498e-68
GLO1	-0.418614	3.11481e-68	1.56624e-67
PGD	-0.826951	4.43862e-68	2.21619e-67
KLHL23	-0.904423	9.32608e-67	4.62391e-66
BHLHE40	-0.557677	9.37574e-66	4.58441e-65
ITGA1	-0.552016	2.05445e-65	9.97677e-65
SYNE2	0.471767	4.1319e-65	1.99287e-64
IGFLR1	-0.682836	5.84503e-65	2.80009e-64
AL592183.1	0.486756	1.15526e-64	5.49716e-64
SLC1A5	-0.779876	2.03249e-64	9.60692e-64
CTSW	-0.381792	4.8598e-63	2.28185e-62
PDE3B	0.480517	1.39078e-61	6.48727e-61
PIM2	0.727132	2.06326e-61	9.5611e-61
HSF4	0.775062	6.6272e-61	3.0511e-60
SNAP47	0.597181	9.09152e-61	4.15864e-60
ZFP36	0.424312	9.85978e-60	4.48115e-59
ATP8B4	-0.619861	1.52663e-59	6.89415e-59
KIT	-0.866149	3.52508e-58	1.58182e-57
MAPK1	-0.541962	3.21971e-57	1.43571e-56
MT1F	0.715609	6.57702e-57	2.91444e-56
HLA-DQA1	-0.351884	2.5544e-56	1.12489e-55
CD40LG	0.945619	3.29227e-56	1.44088e-55
PRNP	0.623036	6.25467e-56	2.72059e-55
CDK2AP2	-0.408177	7.49042e-56	3.23824e-55
PHLDA1	-0.526005	2.45074e-55	1.05308e-54
TPM4	0.511692	5.52843e-55	2.36124e-54
TUBB	-0.469481	5.94233e-55	2.52282e-54
TAGAP	0.628781	2.11949e-54	8.94477e-54
PDCD4	0.501856	9.22399e-54	3.86971e-53
CALM1	0.262596	3.71841e-53	1.5508e-52
CLDND1	-0.43214	1.41328e-52	5.85974e-52
HLA-DQA2	-0.368906	2.42908e-52	1.00129e-51
HSPA1A	-0.686223	4.1294e-52	1.69234e-51
GOLIM4	-0.603366	2.03421e-51	8.28882e-51
HLA-DRA	-0.404417	2.14272e-51	8.68108e-51
PRKAR1A	0.381071	2.22986e-51	8.9828e-51
ESYT1	0.476559	4.24021e-49	1.69848e-48
GZMM	-0.44262	1.01507e-47	4.04317e-47
MT2A	-0.434674	2.06878e-47	8.19421e-47
CD7	0.339648	3.60504e-47	1.41999e-46
FAM3C	-0.652729	5.46506e-47	2.14074e-46
EIF3A	0.34475	2.87689e-46	1.12072e-45
IL18R1	0.68817	3.57434e-46	1.38481e-45
KLF6	-0.378308	4.65974e-46	1.79552e-45
THEM4	0.543675	4.91026e-46	1.88182e-45
SRM	0.572627	5.08933e-46	1.93997e-45
MYO6	-0.73984	7.61733e-46	2.88807e-45
KIF21A	-0.57492	8.06067e-45	3.0399e-44
HMGB1	0.247832	9.38572e-45	3.52089e-44
TFRC	0.624675	1.0888e-44	4.06296e-44
PDE4D	0.538441	1.36548e-44	5.06871e-44
SIRPG	-0.57997	1.49909e-44	5.53571e-44
CMC1	-0.670836	4.72727e-43	1.7366e-42
ERMP1	-0.593479	1.65607e-41	6.05233e-41
ANKRD32	-0.467133	3.68964e-41	1.34152e-40
SLC27A2	-0.649752	1.52053e-40	5.50028e-40
LITAF	0.399886	3.088e-40	1.11137e-39
TNFAIP3	0.576671	2.84648e-39	1.01927e-38
TTC39C	0.483132	1.15561e-38	4.11723e-38
E2F3	-0.522705	3.79042e-38	1.34371e-37
TUBA1A	-0.390122	4.18558e-38	1.47641e-37
BTG1	-0.224428	4.95466e-38	1.73904e-37
RAB7L1	0.483571	9.60299e-38	3.35395e-37
MSC	0.521282	2.23033e-37	7.75148e-37
NFKBIA	-0.511651	2.87169e-37	9.93185e-37
CKAP2L	-0.803241	8.05904e-36	2.76032e-35
PRKCA	-0.503268	8.88217e-36	3.02456e-35
FAM46C	0.521641	8.91585e-36	3.02456e-35
AIF1	-0.570502	9.13691e-36	3.0848e-35
BIRC3	0.599085	9.72504e-36	3.2678e-35
XCL1	-0.716575	1.03862e-35	3.47349e-35
ITM2A	-0.290295	5.19985e-35	1.73084e-34
LPGAT1	0.522281	8.78941e-35	2.912e-34
GPR155	0.59363	1.22136e-34	4.02765e-34
GBP5	0.337091	3.17743e-34	1.04296e-33
DZIP3	0.574528	5.58604e-34	1.82511e-33
FABP5	-0.656302	5.30041e-33	1.72385e-32
CXCR6	0.757092	8.51572e-33	2.75691e-32
CLIC3	0.802792	9.58373e-33	3.08857e-32
ATP8A1	-0.415536	1.09667e-32	3.51826e-32
NCR3	0.348747	1.36328e-32	4.35389e-32
NR3C1	-0.300913	1.69475e-32	5.38824e-32
RGS13	0.501171	1.76598e-32	5.58965e-32
ACP5	-0.621231	1.55751e-31	4.90789e-31
MRPS6	-0.315207	3.95912e-31	1.24204e-30
BCAT1	-0.585317	1.20082e-30	3.75059e-30
FAIM3	0.462626	1.64278e-30	5.10848e-30
SLC1A4	-0.428092	6.89826e-30	2.13575e-29
SPTBN1	0.514406	1.32758e-29	4.09241e-29
LGALS8	-0.449929	7.49895e-28	2.30163e-27
SLC4A7	-0.288655	9.13907e-28	2.79293e-27
LST1	-0.511921	6.86243e-27	2.08818e-26
CCR5	-0.553501	1.97415e-26	5.98151e-26
MPP1	-0.546415	2.79809e-26	8.44189e-26
ITGB2-AS1	-0.543054	4.55662e-26	1.36892e-25
ZFP36L2	0.207718	5.83817e-26	1.74652e-25
GAB3	-0.415891	8.46324e-26	2.52119e-25
ARHGAP18	-0.45518	1.16499e-25	3.45598e-25
CLU	0.344375	1.49577e-25	4.41877e-25
MGAT4A	0.382437	1.8477e-25	5.43575e-25
CCDC50	-0.469699	5.12208e-25	1.49962e-24
ACTA2	-0.454385	5.13972e-25	1.49962e-24
TUBA1B	-0.446797	7.27469e-25	2.11383e-24
CORO1B	-0.399874	1.75013e-24	5.06467e-24
BAZ2B	0.540094	2.1059e-24	6.06945e-24
SQLE	-0.461061	2.33876e-24	6.71327e-24
ETV1	-0.529058	3.41913e-24	9.77486e-24
ACTG1	-0.212735	6.35626e-24	1.80988e-23
PPIB	-0.169827	1.00965e-23	2.86337e-23
RUNX3	0.363129	1.04003e-23	2.93778e-23
SPINK2	0.640259	1.89769e-23	5.33915e-23
ATP2B1	0.392381	2.76642e-23	7.75254e-23
ERN1	-0.296325	1.24163e-22	3.46582e-22
GADD45B	0.389016	1.7349e-22	4.8237e-22
GIMAP7	-0.30528	1.93568e-22	5.36094e-22
GPR56	-0.491507	3.816e-22	1.05274e-21
SAMHD1	0.354316	4.79645e-22	1.31809e-21
DAPK2	0.403102	5.39673e-22	1.47733e-21
SAMD3	0.305025	6.18828e-22	1.6875e-21
CD300A	0.451382	1.16193e-21	3.15634e-21
NUCB2	-0.341655	1.85484e-21	5.0194e-21
LMNA	0.327501	5.02298e-21	1.3541e-20
CD27	-0.352327	7.31837e-21	1.96543e-20
RGS1	-0.497026	1.64907e-20	4.41205e-20
JUNB	0.323674	1.75751e-20	4.68449e-20
TIPARP	0.383455	1.82269e-20	4.84002e-20
MIR142	0.235835	2.33362e-20	6.17364e-20
RCBTB2	-0.269149	5.80283e-20	1.52944e-19
CSGALNACT1	0.454687	7.21184e-20	1.89377e-19
ZBTB38	-0.300751	8.80993e-20	2.30488e-19
TNFSF8	0.437383	1.05992e-19	2.7628e-19
XCL2	-0.475942	1.13897e-19	2.958e-19
PKM	-0.232071	1.30659e-19	3.38092e-19
LBH	0.299041	3.46848e-19	8.94236e-19
TNF	-0.43429	3.76595e-19	9.67413e-19
DDX21	0.347248	6.63041e-19	1.6971e-18
PLEC	0.34479	1.31073e-18	3.34282e-18
CD68	-0.392572	1.78867e-18	4.54541e-18
ANK3	-0.430934	2.89716e-18	7.33603e-18
PFKL	0.347305	8.13673e-18	2.053e-17
AZI2	-0.333636	1.40575e-17	3.53431e-17
PTMS	-0.293674	1.88103e-17	4.71255e-17
OASL	-0.368658	2.12195e-17	5.29741e-17
PTPRK	-0.380267	2.49958e-17	6.21826e-17
TIAM1	0.441317	4.11485e-17	1.02008e-16
PHPT1	-0.276137	7.41457e-17	1.83168e-16
F2R	-0.234737	1.06791e-16	2.629e-16
MCM5	-0.434538	1.57526e-16	3.86456e-16
TMEM2	-0.34041	2.12738e-16	5.20107e-16
ARID5B	0.335976	1.25348e-15	3.05401e-15
AGPAT9	-0.401957	2.42817e-15	5.89579e-15
EGLN3	0.422253	2.85884e-15	6.9178e-15
RPL22L1	-0.2665	3.78352e-15	9.1242e-15
APOBEC3H	-0.290512	4.78299e-15	1.14954e-14
NEK1	-0.313201	4.94752e-15	1.18506e-14
ANP32B	0.187876	7.86241e-15	1.87692e-14
ABCB1	0.359464	8.54635e-15	2.03334e-14
PLCG1	0.327847	1.49118e-14	3.53593e-14
DST	-0.434454	1.53932e-14	3.63793e-14
RGS2	-0.332043	1.57718e-14	3.71501e-14
ARL4A	-0.330717	3.00377e-14	7.02862e-14
LPAR6	-0.185942	3.42192e-14	7.98073e-14
TPRG1	-0.32742	6.08629e-14	1.41481e-13
ZFP36L1	0.222228	7.63144e-14	1.7682e-13
SOCS1	-0.351985	7.82155e-14	1.80634e-13
CDC14A	0.308733	9.09187e-14	2.0929e-13
SMARCA2	-0.304571	9.5806e-14	2.19827e-13
PTPN22	-0.203301	1.35747e-13	3.10467e-13
AGA	0.310799	2.38092e-13	5.42789e-13
TMEM30A	-0.264886	3.73217e-13	8.48111e-13
SLC7A6	-0.325447	9.5286e-13	2.1584e-12
CRYBG3	-0.34916	1.33287e-12	3.00957e-12
INSIG1	0.293019	1.64964e-12	3.71299e-12
TRIM22	-0.323173	1.74864e-12	3.92338e-12
PRR5L	0.317462	1.79379e-12	4.01198e-12
CCND2	-0.250934	2.28051e-12	5.08453e-12
RGL4	-0.313135	3.27374e-12	7.27612e-12
SQSTM1	-0.167378	5.94005e-12	1.31199e-11
LYAR	0.353905	7.79721e-12	1.71684e-11
MIR146A	0.298602	8.00258e-12	1.7566e-11
IL2RB	-0.194977	1.0975e-11	2.40163e-11
SPEN	0.255718	1.13948e-11	2.48582e-11
PASK	-0.281482	1.63253e-11	3.5505e-11
HSH2D	0.261765	1.96138e-11	4.25265e-11
CD28	0.33755	2.228e-11	4.81601e-11
SYTL2	0.20849	2.29577e-11	4.94741e-11
REG4	-0.306151	2.89172e-11	6.21282e-11
KIAA1109	0.244467	3.2969e-11	7.06194e-11
PRDM1	-0.287175	5.1775e-11	1.10568e-10
RPS27L	-0.170412	5.35384e-11	1.1399e-10
CTNNAL1	-0.370714	5.52502e-11	1.17283e-10
PTTG1	-0.291356	1.12854e-10	2.38846e-10
DNAJB9	-0.257466	1.64281e-10	3.46653e-10
MMP25	0.263024	1.71644e-10	3.61114e-10
KDSR	-0.268233	1.88303e-10	3.9499e-10
GPR65	0.27889	2.32313e-10	4.85869e-10
CDKN1A	-0.429265	2.38007e-10	4.96314e-10
CKAP2	0.264732	2.69297e-10	5.59917e-10
BATF	-0.213099	3.12814e-10	6.48494e-10
MYH9	0.15623	3.66985e-10	7.58578e-10
GPR15	-0.266429	4.65875e-10	9.6019e-10
PDIA4	-0.206348	1.09619e-09	2.25276e-09
XIST	0.201804	1.10375e-09	2.26021e-09
JUN	-0.284106	1.10619e-09	2.26021e-09
FOXP1	-0.259701	1.13547e-09	2.31336e-09
GBP1	0.291786	1.4334e-09	2.91199e-09
ISG20	0.192895	1.8594e-09	3.7666e-09
SORL1	0.160725	2.16883e-09	4.3809e-09
LGALS1	-0.167796	2.6731e-09	5.38417e-09
ATAD2	-0.299585	2.82601e-09	5.67604e-09
BTG2	-0.202887	2.90714e-09	5.82249e-09
APP	0.265366	3.55495e-09	7.07994e-09
RNF144A	-0.227738	4.45627e-09	8.85013e-09
NPDC1	0.224792	4.53879e-09	8.98883e-09
HIPK2	0.217312	4.60533e-09	9.0952e-09
H2AFV	0.176506	5.88258e-09	1.15483e-08
KIF20B	-0.298437	5.89631e-09	1.15483e-08
ENTPD1	-0.274687	6.2192e-09	1.21471e-08
SMC2	-0.30298	9.14691e-09	1.78164e-08
IL2RA	-0.238309	9.67191e-09	1.87874e-08
KIAA0319L	-0.250787	9.75975e-09	1.89062e-08
PRKCDBP	-0.289949	1.28786e-08	2.488e-08
DPP4	-0.20923	1.8537e-08	3.5714e-08
RDX	-0.224741	2.36069e-08	4.53586e-08
PTGER4	0.223535	2.75902e-08	5.28688e-08
RUNX2	0.201719	3.45772e-08	6.60789e-08
HNRNPAB	-0.233014	3.60465e-08	6.87015e-08
MSH3	0.236778	4.94771e-08	9.40463e-08
LAG3	0.1645	5.60346e-08	1.06226e-07
ID2	-0.134163	6.3875e-08	1.20766e-07
PTP4A1	-0.233907	8.73354e-08	1.64683e-07
RAB37	0.178781	8.97055e-08	1.68703e-07
RPS6KA5	0.198607	1.26935e-07	2.3746e-07
CNN2	0.126694	1.54154e-07	2.8762e-07
HYOU1	-0.22543	1.68178e-07	3.1296e-07
TUBA4A	-0.136947	2.15029e-07	3.99098e-07
TNFSF10	0.169178	2.46124e-07	4.55618e-07
NCDN	-0.26947	3.64237e-07	6.72511e-07
ASB2	-0.224956	4.04153e-07	7.44271e-07
TBX21	0.22321	4.58328e-07	8.39676e-07
TTC3	0.191578	6.06066e-07	1.10748e-06
TESC	-0.195708	6.15376e-07	1.1216e-06
RN7SL1	-0.261491	6.63051e-07	1.20539e-06
RMRP	0.348809	7.24457e-07	1.31366e-06
ARL6IP1	-0.201024	9.53725e-07	1.72498e-06
MT1E	-0.260182	1.3323e-06	2.40357e-06
PTPRE	-0.223199	1.371e-06	2.4671e-06
CENPU	-0.30932	1.39772e-06	2.50883e-06
PHIP	-0.172735	1.97283e-06	3.53217e-06
GPSM2	0.250894	2.30914e-06	4.12388e-06
CLSTN3	-0.193215	2.45582e-06	4.37482e-06
HERC5	0.232676	2.63275e-06	4.67825e-06
FUCA1	-0.242387	2.97063e-06	5.26544e-06
PMCH	-0.292692	3.07991e-06	5.44552e-06
PPAPDC1B	-0.20997	3.96249e-06	6.98016e-06
CLSPN	-0.294269	3.96756e-06	6.98016e-06
DNMT1	-0.199839	4.06325e-06	7.1308e-06
C9orf142	0.119233	4.2303e-06	7.40563e-06
SESN1	-0.217893	4.30215e-06	7.51287e-06
GADD45A	-0.231404	4.37643e-06	7.62381e-06
SPRY1	-0.234192	5.07031e-06	8.81091e-06
TGFBR3	0.197827	5.42226e-06	9.39947e-06
PRC1	-0.288975	6.35654e-06	1.09922e-05
MDM2	-0.187082	6.52397e-06	1.12542e-05
MYCBP2	0.15285	8.66035e-06	1.49034e-05
PIK3IP1	0.177049	8.96564e-06	1.53914e-05
AHI1	-0.177961	9.37977e-06	1.60634e-05
NCOA7	-0.203183	1.0275e-05	1.75541e-05
NELL2	-0.124474	1.22549e-05	2.08864e-05
ASCC3	-0.17484	1.28077e-05	2.17762e-05
VIM-AS1	0.152821	1.29239e-05	2.19212e-05
HMGN1	-0.10665	1.34963e-05	2.28374e-05
MIIP	-0.175807	1.77672e-05	2.99928e-05
CNTRL	0.166627	1.98373e-05	3.34077e-05
PTMA	-0.0789932	2.16072e-05	3.63021e-05
KPNA2	-0.240317	2.22449e-05	3.72851e-05
MT-ND6	-0.122394	2.49451e-05	4.17125e-05
FGFBP2	-0.303652	2.79556e-05	4.66365e-05
NUCKS1	-0.148332	3.04689e-05	5.071e-05
HMGA1	-0.175265	3.12815e-05	5.19406e-05
C1orf63	0.0978731	3.68355e-05	6.08995e-05
GNPDA1	-0.180884	3.69297e-05	6.08995e-05
FGFR1	0.214588	3.69348e-05	6.08995e-05
CECR1	0.152803	4.18532e-05	6.8849e-05
SFPQ	0.118261	4.875e-05	8.00087e-05
NBPF14	0.151564	5.75056e-05	9.39435e-05
HTATSF1	-0.139929	5.82958e-05	9.50154e-05
MCL1	0.112668	6.23714e-05	0.000101425
ADAM8	0.148642	6.34731e-05	0.00010298
XBP1	0.1038	7.37302e-05	0.000119349
ITGAE	0.171034	8.7872e-05	0.000141916
FEN1	-0.220724	9.4556e-05	0.000152364
SLC38A2	0.150162	9.75716e-05	0.000156867
CEP55	-0.314512	9.87924e-05	0.00015847
TYMS	-0.390712	0.000116403	0.000186298
CEP350	0.120558	0.000129994	0.00020758
PLIN2	-0.13106	0.000136984	0.00021825
SLC2A8	-0.148486	0.000175687	0.000279287
NPC2	0.131093	0.000215349	0.000341571
TRIP11	0.144889	0.000265485	0.000420154
EEA1	0.167673	0.000281942	0.000445205
AKAP5	-0.191077	0.000328711	0.000517902
C5orf42	-0.185974	0.000340745	0.000535672
ESF1	0.158101	0.00035436	0.000555843
EZH2	-0.16933	0.000464696	0.000727306
HMGB3	-0.233524	0.000473295	0.000739133
IQGAP1	-0.0903154	0.000498401	0.000776629
SLC20A1	-0.120721	0.00050545	0.000785886
CEP78	0.16988	0.000593815	0.000921258
SPOCK2	-0.0856774	0.000671502	0.00103951
CBLB	0.105428	0.000782772	0.00120912
CCNG1	0.129485	0.000858484	0.00132319
C12orf57	0.084152	0.000879491	0.00135262
HIP1	-0.164884	0.0010392	0.00159479
SMC1A	-0.12867	0.00107439	0.00164523
ITPR2	-0.137031	0.00126938	0.00193963
PCNA	-0.159115	0.00131798	0.00200956
HIST1H1E	-0.141436	0.001375	0.00209201
CENPK	0.125724	0.00143356	0.00217643
SLC39A10	0.129738	0.00145582	0.00220551
ADI1	0.142458	0.0014937	0.00225806
CDKN2D	0.138523	0.00160482	0.00242089
FKBP5	-0.113379	0.00214035	0.00322189
MACF1	-0.098663	0.00220731	0.00331564
STK17B	-0.0726718	0.00227968	0.0034171
HLA-DPB1	-0.0733354	0.0023147	0.00346229
HPGD	-0.0918636	0.00232877	0.00347599
TXNIP	0.0832577	0.00247381	0.00368472
H2AFX	-0.164476	0.00279523	0.00415475
TK1	-0.160058	0.00280172	0.00415568
MCM4	-0.169	0.00283864	0.00420166
ATRX	0.0781259	0.00293259	0.00432268
ARHGAP11A	-0.174008	0.00319083	0.00469357
CENPE	-0.219603	0.00320648	0.00470683
MAD2L1	-0.161868	0.00337496	0.00494389
HNRNPA2B1	-0.0623292	0.0034603	0.00505845
RACGAP1	-0.172072	0.00357564	0.00521632
GALNT2	-0.124832	0.00361776	0.00526693
CKS1B	-0.193304	0.00367938	0.00534566
USP1	0.11582	0.00460603	0.00667827
NNT-AS1	-0.140783	0.00464484	0.0067208
PBXIP1	-0.087049	0.0047016	0.00678908
CD44	0.0965114	0.00511719	0.00737417
DOCK11	0.103913	0.00600407	0.00863466
NEIL3	0.137015	0.0071257	0.010227
SAC3D1	0.13415	0.00724591	0.0103785
ANKRD26	-0.137528	0.00731841	0.0104612
DDB2	-0.108312	0.00737162	0.010516
HNRNPU	-0.0665403	0.00810609	0.0115406
SVIP	-0.121304	0.0083192	0.0118203
TUBA1C	-0.110729	0.0090864	0.0128588
CENPW	-0.153737	0.00913434	0.0129009
N4BP2	0.117705	0.00920837	0.0129796
HSP90AB1	0.0636873	0.00944687	0.0132893
MCM3	-0.122349	0.00996581	0.0139816
CFH	-0.10987	0.00997839	0.0139816
FOXP3	0.203517	0.0104272	0.0145816
HIST1H1C	0.110018	0.0107444	0.0149956
ASF1B	-0.149821	0.0115049	0.0160255
SMC6	-0.104646	0.0115623	0.0160739
LMO4	0.10075	0.012514	0.0173629
HIST1H2BK	-0.123549	0.0131278	0.0181789
AKAP9	0.0686018	0.0137004	0.0189348
PAG1	0.0603867	0.0138521	0.0191073
VCAM1	-0.116358	0.0144523	0.0198964
FDXR	-0.126591	0.0149661	0.0205638
HDGF	-0.110834	0.0161294	0.0221195
ZWINT	-0.144798	0.0176745	0.0241916
PLK1	-0.240675	0.017807	0.0243259
RRM2	-0.307575	0.0204452	0.0278763
ODC1	0.0969564	0.0209778	0.0285475
ATAD5	-0.12697	0.021303	0.0289346
MCM7	-0.122884	0.0214232	0.0290421
DDIT3	-0.101165	0.0222907	0.0301605
MIA3	0.0825155	0.0231496	0.0312629
MAF	0.118767	0.0244629	0.0329738
GCC2	0.0686217	0.0261799	0.0352212
HIST1H2BC	-0.129835	0.0263523	0.0353859
LBR	-0.0736881	0.027247	0.0365182
BDP1	0.0756532	0.0277361	0.0371036
CASC5	-0.16764	0.0297554	0.0397162
GIMAP4	0.0822249	0.0298012	0.0397162
POLR2A	-0.084118	0.0302949	0.0402985
7SK.2	-0.161729	0.0311262	0.0413267
FAM133B	0.0819412	0.0312251	0.0413805
TUBB4B	-0.0804304	0.0313137	0.0414206
CEP152	-0.118494	0.0321536	0.0424523
CCNB1	-0.196902	0.0323002	0.0425667
ZMAT3	-0.105548	0.0326683	0.0429718
NUSAP1	-0.152916	0.0339792	0.0446134
NUMA1	0.0823559	0.0345664	0.0453006
TTN	-0.0743494	0.0359884	0.0470771
HIST1H2AC	0.0981383	0.0366885	0.0479045
CDK1	-0.187345	0.0368797	0.0480657
